# Supplementary material for: Relationships between barley consumption and gut microbiome characteristics in a healthy Japanese population: a cross-sectional study
Source: PubMed Central journal article supplement (PMC8919566; doi:10.1186/s40795-022-00500-3), 2022-03-14
Supplement: 40795_2022_500_MOESM1_ESM.pdf [file 40795_2022_500_MOESM1_ESM.pdf]

**Table S1** Criterion of risk group of diabetes, hypertension, and dislipidemia.

| Variable                 | <i>N</i> (Male) | Low barley<br>( <i>N</i> = 119) | High barley<br>( <i>N</i> = 117) | Criterion                                                                                                   |
|--------------------------|-----------------|---------------------------------|----------------------------------|-------------------------------------------------------------------------------------------------------------|
| <b>Diabetes risk</b>     |                 |                                 |                                  |                                                                                                             |
| Risk 2                   | 8 (8)           | 3                               | 5                                | HbA1c $\geq$ 6.5% or Fasting blood glucose $\geq$ 126 mg/dL or Under medication                             |
| Risk 1                   | 5 (5)           | 4                               | 1                                | Who were not Risk 2, and Fasting blood glucose $\geq$ 110 mg/dL                                             |
| Risk 0                   | 223 (161)       | 110                             | 113                              | Who were neither Risk 1 nor Risk 2                                                                          |
| <b>Hypertension risk</b> |                 |                                 |                                  |                                                                                                             |
| Risk 2                   | 46 (43)         | 20                              | 26                               | SBP $\geq$ 140 mmHg or DBP $\geq$ 90 mmHg or Under medication                                               |
| Risk 1                   | 20 (16)         | 11                              | 9                                | Who were not Risk 2, and either SBP $\geq$ 130 mgHg or DBP $\geq$ 85 mgHg                                   |
| Risk 0                   | 170 (115)       | 86                              | 84                               | Who were neither Risk 1 nor Risk 2                                                                          |
| <b>Dislipidemia risk</b> |                 |                                 |                                  |                                                                                                             |
| Risk 2                   | 97 (84)         | 46                              | 51                               | TG $\geq$ 150 mg/dL or HDL-cholesterol $<$ 40 mg/dL or LDL-cholesterol $\geq$ 140 mg/dL or Under medication |
| Risk 1                   | 31 (25)         | 17                              | 14                               | Who were not Risk 2, and LDL-cholesterol $\geq$ 120 mg/dL                                                   |
| Risk 0                   | 108 (65)        | 54                              | 54                               | Who were neither Risk 1 nor Risk 2                                                                          |

Risk 2 means disease, Risk 1 means border line, and Risk 0 means healthy participants.

Range of barley consumption; Low barley: 0-3.5 g/1000 kcal, High barley: 3.6-28 g/1000 kcal

**Table S2** Comparison of diet between low barley group and high barley group on cross-sectional study (*n* 94).

| Variable (g/1000 kcal)           | Low barley ( <i>n</i> = 47)<br>0-3.5 g/1000 kcal <sup>1</sup> | High barley ( <i>n</i> = 47)<br>3.5-28 g/1000 kcal <sup>1</sup> | <i>P</i> <sup>2</sup> | Model 2 <sup>3</sup> | Model 3 <sup>3</sup> |
|----------------------------------|---------------------------------------------------------------|-----------------------------------------------------------------|-----------------------|----------------------|----------------------|
| <i>Category</i>                  |                                                               |                                                                 |                       |                      |                      |
| Cereal                           | 213 ± 55                                                      | 236 ± 58                                                        | 0.048                 | ○                    | ○                    |
| Potato                           | 19 ± 16                                                       | 21 ± 14                                                         | 0.40                  |                      |                      |
| Sugar and sweetener              | 3.9 ± 3.7                                                     | 2.4 ± 2.4                                                       | 0.03                  | ○                    | ○                    |
| Legume                           | 20 ± 15                                                       | 27 ± 20                                                         | 0.056                 | ○                    | ○                    |
| Green vegetable                  | 37 ± 24                                                       | 44 ± 31                                                         | 0.25                  |                      | ○                    |
| Other vegetable <sup>4</sup>     | 62 ± 29                                                       | 72 ± 45                                                         | 0.20                  |                      | ○                    |
| Fruit                            | 36 ± 32                                                       | 35 ± 30                                                         | 0.87                  |                      |                      |
| Fish                             | 32 ± 15                                                       | 31 ± 16                                                         | 0.74                  |                      | ○                    |
| Meat                             | 48 ± 26                                                       | 45 ± 15                                                         | 0.47                  |                      |                      |
| Egg                              | 18 ± 10                                                       | 20 ± 13                                                         | 0.45                  |                      |                      |
| Milk                             | 54 ± 43                                                       | 48 ± 44                                                         | 0.49                  |                      |                      |
| Oil                              | 6.9 ± 2.2                                                     | 7.2 ± 2.2                                                       | 0.53                  |                      |                      |
| Confectionery                    | 26 ± 20                                                       | 25 ± 17                                                         | 0.81                  |                      | ○                    |
| Beverage <sup>4</sup>            | 439 ± 271                                                     | 335 ± 226                                                       | 0.047                 | ○                    | ○                    |
| Seasoning and spice <sup>4</sup> | 128 ± 45                                                      | 135 ± 70                                                        | 0.57                  |                      |                      |
| <i>In detail</i>                 |                                                               |                                                                 |                       |                      |                      |
| Rice                             | 141 ± 54                                                      | 173 ± 61                                                        | 0.007                 |                      |                      |
| Natto                            | 3.6 ± 4.2                                                     | 10.4 ± 12.0                                                     | <0.001                |                      |                      |
| Green leafy vegetables           | 11 ± 10                                                       | 17 ± 17                                                         | 0.04                  |                      |                      |
| Carrot and Pumpkin               | 6.7 ± 5.9                                                     | 10.1 ± 8.4                                                      | 0.03                  |                      |                      |
| Seaweed                          | 3.5 ± 2.8                                                     | 4.0 ± 3.9                                                       | 0.51                  |                      |                      |
| Mushroom                         | 4.4 ± 2.5                                                     | 5.0 ± 4.1                                                       | 0.37                  |                      |                      |
| Boiled fish                      | 25 ± 28                                                       | 15 ± 16                                                         | 0.052                 |                      |                      |
| Japanese confectionery           | 3.8 ± 3.4                                                     | 2.8 ± 2.5                                                       | 0.08                  |                      |                      |

|           |           |         |       |
|-----------|-----------|---------|-------|
| Ice cream | 18 ± 19   | 12 ± 12 | 0.08  |
| Coffee    | 136 ± 113 | 84 ± 91 | 0.015 |
| Cola      | 67 ± 65   | 37 ± 50 | 0.013 |

---

Data are shown as Means ± SD

- 1) Range of barley consumption.
- 2) Student's *t*-test
- 3) Model variables were used as the independent variables on the multiple regression analyses.
- 4) Other vegetables include mushroom and seaweed.  
Beverage include fruit or vegetable drink.  
Seasoning include liquid seasoning.

**Table S3** Alpha-diversity, compared low barley with high barley group on cross-sectional study (aged 19-65 years in 2018, Japan).

| Variable | Low barley ( <i>n</i> = 47)    | High barley ( <i>n</i> = 47)   | $P_{\text{crude}}^1$ | $P_{\text{FDR}}^2$ |
|----------|--------------------------------|--------------------------------|----------------------|--------------------|
|          | range: 0-3.5 g/1000 kcal       | range: 3.5-28 g/1000 kcal      |                      |                    |
|          | Median [ Interquartile range ] | Median [ Interquartile range ] |                      |                    |
| Observed | 561 [ 482, 649 ]               | 549 [ 500, 628 ]               | 0.86                 | 0.87               |
| Chao1    | 1146 [ 919, 1290 ]             | 1170 [ 971, 1419 ]             | 0.41                 | 0.68               |
| Shannon  | 3.77 [ 3.46, 3.95 ]            | 3.77 [ 3.57, 4.14 ]            | 0.38                 | 0.68               |
| Simpson  | 0.94 [ 0.90, 0.95 ]            | 0.94 [ 0.92, 0.96 ]            | 0.21                 | 0.68               |
| Fisher   | 128 [ 106, 156 ]               | 125 [ 111, 149 ]               | 0.87                 | 0.87               |

<sup>1</sup> Compared low and high barley groups using Mann-Whitney *U*-test (crude *P* value)

<sup>2</sup> Compared low and high barley groups using Mann-Whitney *U*-test adjusted with FDR method

**Table S4** Relative abundance(%) of the frequent 50 genera, compared low barley with high barley group on cross-sectional study (aged 19-65 years in 2018, Japan).

| Genus                             | Low barley ( <i>n</i> = 47)    | High barley ( <i>n</i> = 47)   | $P_{\text{clude}}^1$ | $P_{\text{FDR}}^2$ |
|-----------------------------------|--------------------------------|--------------------------------|----------------------|--------------------|
|                                   | range: 0-3.5 g/1000 kcal       | range: 3.5-28 g/1000 kcal      |                      |                    |
|                                   | Median [ Interquartile range ] | Median [ Interquartile range ] |                      |                    |
| <i>Bacteroides</i>                | 31.27 [ 0.01, 28.98 ]          | 29.28 [ 1.71, 27.52 ]          | 0.50                 | 0.79               |
| <i>Blautia</i>                    | 6.15 [ 0.78, 7.48 ]            | 5.81 [ 1.63, 6.67 ]            | 0.64                 | 0.85               |
| <i>Bifidobacterium</i>            | 2.73 [ 0.00, 5.10 ]            | 5.61 [ 0.00, 8.12 ]            | 0.01                 | 0.37               |
| <i>Faecalibacterium</i>           | 5.76 [ 0.00, 6.02 ]            | 6.08 [ 0.00, 6.34 ]            | 0.54                 | 0.79               |
| <i>Prevotella 9</i>               | 0.01 [ 0.00, 6.96 ]            | 0.00 [ 0.00, 3.90 ]            | 0.20                 | 0.59               |
| <i>Eubacterium rectale</i> group  | 1.10 [ 0.00, 2.28 ]            | 1.56 [ 0.00, 2.62 ]            | 0.73                 | 0.87               |
| <i>Parabacteroides</i>            | 2.28 [ 0.00, 2.62 ]            | 1.64 [ 0.00, 1.96 ]            | 0.18                 | 0.59               |
| <i>Subdoligranulum</i>            | 1.12 [ 0.00, 1.80 ]            | 1.83 [ 0.00, 2.32 ]            | 0.08                 | 0.44               |
| <i>Collinsella</i>                | 0.92 [ 0.00, 1.82 ]            | 1.95 [ 0.00, 2.20 ]            | 0.03                 | 0.42               |
| <i>Sutterella</i>                 | 1.41 [ 0.00, 1.82 ]            | 1.43 [ 0.00, 2.02 ]            | 0.99                 | 0.99               |
| <i>Megamonas</i>                  | 0.00 [ 0.00, 3.03 ]            | 0.00 [ 0.00, 0.76 ]            | 0.20                 | 0.59               |
| <i>Ruminococcus torques</i> group | 1.27 [ 0.03, 1.67 ]            | 1.09 [ 0.01, 1.73 ]            | 0.36                 | 0.72               |
| <i>Anaerostipes</i>               | 0.89 [ 0.02, 1.28 ]            | 1.06 [ 0.07, 1.92 ]            | 0.0502               | 0.42               |
| <i>Lachnoclostridium</i>          | 1.22 [ 0.19, 1.69 ]            | 1.23 [ 0.04, 1.48 ]            | 0.53                 | 0.79               |
| <i>Fusicatenibacter</i>           | 1.41 [ 0.00, 1.49 ]            | 1.00 [ 0.00, 1.40 ]            | 0.83                 | 0.90               |
| <i>Fusobacterium</i>              | 0.00 [ 0.00, 1.14 ]            | 0.00 [ 0.00, 1.65 ]            | 0.91                 | 0.95               |
| <i>Eubacterium hallii</i> group   | 0.97 [ 0.00, 1.28 ]            | 0.78 [ 0.00, 0.97 ]            | 0.60                 | 0.83               |
| <i>Alistipes</i>                  | 0.21 [ 0.00, 0.82 ]            | 0.40 [ 0.00, 1.30 ]            | 0.34                 | 0.72               |
| <i>Lachnospira</i>                | 0.41 [ 0.00, 0.78 ]            | 0.62 [ 0.00, 1.10 ]            | 0.22                 | 0.59               |
| <i>Prevotella 2</i>               | 0.00 [ 0.00, 0.34 ]            | 0.00 [ 0.00, 1.46 ]            | 0.99                 | 0.99               |
| <i>Megasphaera</i>                | 0.00 [ 0.00, 0.65 ]            | 0.00 [ 0.00, 1.15 ]            | 0.28                 | 0.66               |
| <i>Roseburia</i>                  | 0.66 [ 0.00, 1.04 ]            | 0.40 [ 0.00, 0.72 ]            | 0.18                 | 0.59               |

|                                            |                     |                     |      |      |
|--------------------------------------------|---------------------|---------------------|------|------|
| <i>Veillonella</i>                         | 0.03 [ 0.00, 1.06 ] | 0.03 [ 0.00, 0.70 ] | 0.47 | 0.79 |
| <i>Phascolarctobacterium</i>               | 0.01 [ 0.00, 0.79 ] | 0.00 [ 0.00, 0.70 ] | 0.58 | 0.83 |
| <i>Escherichia Shigella</i>                | 0.07 [ 0.00, 0.72 ] | 0.05 [ 0.00, 0.75 ] | 0.73 | 0.87 |
| Lachnospiraceae family uncultured          | 0.49 [ 0.01, 0.72 ] | 0.59 [ 0.00, 0.70 ] | 0.91 | 0.95 |
| <i>Alloprevotella</i>                      | 0.00 [ 0.00, 0.56 ] | 0.00 [ 0.00, 0.74 ] | 0.77 | 0.89 |
| <i>Dorea</i>                               | 0.40 [ 0.00, 0.81 ] | 0.35 [ 0.00, 0.43 ] | 0.32 | 0.72 |
| <i>Ruminococcus 2</i>                      | 0.00 [ 0.00, 0.37 ] | 0.01 [ 0.00, 0.86 ] | 0.04 | 0.42 |
| <i>Butyricicoccus</i>                      | 0.43 [ 0.00, 0.46 ] | 0.65 [ 0.12, 0.65 ] | 0.00 | 0.09 |
| Lachnospiraceae UCG-008                    | 0.52 [ 0.00, 0.57 ] | 0.32 [ 0.00, 0.48 ] | 0.81 | 0.90 |
| <i>Ruminococcus 1</i>                      | 0.01 [ 0.00, 0.28 ] | 0.01 [ 0.00, 0.69 ] | 0.34 | 0.72 |
| <i>Acidaminococcus</i>                     | 0.00 [ 0.00, 0.30 ] | 0.03 [ 0.00, 0.66 ] | 0.07 | 0.44 |
| Ruminococcaceae family uncultured          | 0.23 [ 0.00, 0.42 ] | 0.24 [ 0.00, 0.54 ] | 0.64 | 0.85 |
| <i>Parasutterella</i>                      | 0.02 [ 0.00, 0.38 ] | 0.02 [ 0.00, 0.57 ] | 0.50 | 0.79 |
| <i>Streptococcus</i>                       | 0.12 [ 0.00, 0.52 ] | 0.20 [ 0.00, 0.43 ] | 0.50 | 0.79 |
| <i>Mitsuokella</i>                         | 0.00 [ 0.00, 0.59 ] | 0.00 [ 0.00, 0.35 ] | 0.38 | 0.73 |
| Prevotellaceae NK3B31 group                | 0.00 [ 0.00, 0.48 ] | 0.00 [ 0.00, 0.28 ] | 0.71 | 0.87 |
| <i>Dialister</i>                           | 0.00 [ 0.00, 0.31 ] | 0.07 [ 0.00, 0.43 ] | 0.04 | 0.42 |
| <i>Ruminiclostridium 5</i>                 | 0.12 [ 0.00, 0.36 ] | 0.15 [ 0.01, 0.32 ] | 0.66 | 0.85 |
| Ruminococcaceae UCG-013                    | 0.09 [ 0.00, 0.27 ] | 0.22 [ 0.00, 0.34 ] | 0.06 | 0.44 |
| <i>Barnesiella</i>                         | 0.00 [ 0.00, 0.23 ] | 0.05 [ 0.00, 0.36 ] | 0.22 | 0.59 |
| Ruminococcaceae UCG-002                    | 0.00 [ 0.00, 0.17 ] | 0.01 [ 0.00, 0.39 ] | 0.19 | 0.59 |
| Rhodospirillaceae family uncultured        | 0.00 [ 0.00, 0.26 ] | 0.00 [ 0.00, 0.27 ] | 0.43 | 0.79 |
| <i>Ruminococcus gnavreuii</i> group        | 0.00 [ 0.00, 0.23 ] | 0.00 [ 0.00, 0.25 ] | 0.79 | 0.90 |
| <i>Paraprevotella</i>                      | 0.00 [ 0.00, 0.31 ] | 0.00 [ 0.00, 0.17 ] | 0.20 | 0.59 |
| <i>Odoribacter</i>                         | 0.04 [ 0.00, 0.21 ] | 0.10 [ 0.00, 0.24 ] | 0.48 | 0.79 |
| <i>Eubacterium coprostanoligenes</i> group | 0.00 [ 0.00, 0.14 ] | 0.01 [ 0.00, 0.30 ] | 0.21 | 0.59 |
| <i>Bilophila</i>                           | 0.10 [ 0.00, 0.18 ] | 0.14 [ 0.00, 0.25 ] | 0.24 | 0.60 |

|                    |                     |                     |      |      |
|--------------------|---------------------|---------------------|------|------|
| <i>Tyzzrella</i> 3 | 0.00 [ 0.00, 0.10 ] | 0.00 [ 0.00, 0.29 ] | 0.22 | 0.59 |
|--------------------|---------------------|---------------------|------|------|

---

<sup>1</sup> Compared low and high barley groups using Mann-Whitney *U*-test (crude *P* value)

<sup>2</sup> Compared low and high barley groups using Mann-Whitney *U*-test adjusted with FDR method

**Table S5** Results of Multiple regression analysis (dichotomy and continuous) and Kendall rank correlation between barley consumption (g/1000 kcal) and intestinal bacterias on cross-sectional study (aged 19-65 years in 2018, Japan).

| Genus                             | Multiple regression (Barley:dichotomy) <sup>1)</sup> |      |         | Multiple regression (Barley:continuous) <sup>2)</sup> |      |         | Kendall rank correlation <sup>3)</sup> |         |
|-----------------------------------|------------------------------------------------------|------|---------|-------------------------------------------------------|------|---------|----------------------------------------|---------|
|                                   | Estimate                                             | SE   | P value | Estimate                                              | SE   | P value | Estimate                               | P value |
| <i>Bacteroides</i>                | -1.51                                                | 3.15 | 0.63    | -0.20                                                 | 0.34 | 0.57    | -0.05                                  | 0.48    |
| <i>Blautia</i>                    | -0.85                                                | 0.85 | 0.32    | -0.06                                                 | 0.09 | 0.50    | -0.05                                  | 0.47    |
| <i>Bifidobacterium</i>            | 2.78                                                 | 1.63 | 0.09    | 0.36                                                  | 0.18 | 0.04    | 0.17                                   | 0.01    |
| <i>Faecalibacterium</i>           | -0.21                                                | 1.09 | 0.85    | -0.14                                                 | 0.12 | 0.23    | 0.07                                   | 0.32    |
| <i>Prevotella 9</i>               | -2.60                                                | 2.91 | 0.38    | -0.25                                                 | 0.32 | 0.44    | -0.09                                  | 0.27    |
| <i>Eubacterium rectale</i> group  | 0.55                                                 | 0.58 | 0.34    | 0.06                                                  | 0.06 | 0.37    | 0.02                                   | 0.80    |
| <i>Parabacteroides</i>            | -0.65                                                | 0.39 | 0.10    | -0.04                                                 | 0.04 | 0.35    | -0.11                                  | 0.12    |
| <i>Subdoligranulum</i>            | 0.43                                                 | 0.46 | 0.36    | -0.03                                                 | 0.05 | 0.57    | 0.06                                   | 0.38    |
| <i>Collinsella</i>                | 0.50                                                 | 0.52 | 0.34    | 0.08                                                  | 0.06 | 0.15    | 0.12                                   | 0.10    |
| <i>Sutterella</i>                 | 0.24                                                 | 0.44 | 0.59    | -0.04                                                 | 0.05 | 0.42    | -0.03                                  | 0.67    |
| <i>Megamonas</i>                  | -1.87                                                | 1.15 | 0.11    | -0.19                                                 | 0.12 | 0.13    | -0.11                                  | 0.19    |
| <i>Ruminococcus torques</i> group | 0.16                                                 | 0.41 | 0.70    | 0.00                                                  | 0.04 | 0.94    | -0.05                                  | 0.45    |
| <i>Anaerostipes</i>               | 0.71                                                 | 0.36 | 0.05    | 0.04                                                  | 0.04 | 0.36    | 0.08                                   | 0.25    |
| <i>Lachnoclostridium</i>          | -0.17                                                | 0.27 | 0.54    | 0.00                                                  | 0.03 | 0.96    | -0.04                                  | 0.54    |
| <i>Fusicatenibacter</i>           | -0.06                                                | 0.27 | 0.82    | -0.02                                                 | 0.03 | 0.46    | -0.02                                  | 0.80    |
| <i>Fusobacterium</i>              | 0.74                                                 | 0.85 | 0.39    | 0.05                                                  | 0.09 | 0.61    | -0.03                                  | 0.72    |
| <i>Eubacterium hallii</i> group   | -0.42                                                | 0.24 | 0.08    | -0.02                                                 | 0.03 | 0.50    | 0.00                                   | 0.98    |
| <i>Alistipes</i>                  | 0.29                                                 | 0.37 | 0.44    | 0.00                                                  | 0.04 | 1.00    | 0.05                                   | 0.44    |
| <i>Lachnospira</i>                | 0.23                                                 | 0.25 | 0.36    | 0.03                                                  | 0.03 | 0.26    | 0.16                                   | 0.03    |



|                                   |       |      |      |       |      |        |       |       |
|-----------------------------------|-------|------|------|-------|------|--------|-------|-------|
| <i>Prevotella 2</i>               | 1.41  | 0.64 | 0.03 | 0.03  | 0.07 | 0.68   | -0.01 | 0.90  |
| <i>Megasphaera</i>                | 0.74  | 0.60 | 0.22 | 0.28  | 0.06 | <0.001 | 0.06  | 0.43  |
| <i>Roseburia</i>                  | -0.40 | 0.22 | 0.08 | -0.03 | 0.02 | 0.16   | -0.07 | 0.32  |
| <i>Veillonella</i>                | -0.37 | 0.44 | 0.40 | -0.01 | 0.05 | 0.86   | 0.14  | 0.07  |
| <i>Phascolarctobacterium</i>      | -0.19 | 0.22 | 0.39 | -0.01 | 0.02 | 0.66   | 0.00  | 0.96  |
| <i>Escherichia Shigella</i>       | 0.06  | 0.47 | 0.90 | 0.06  | 0.05 | 0.26   | 0.03  | 0.69  |
| Lachnospiraceae family uncultured | 0.02  | 0.14 | 0.90 | 0.04  | 0.01 | 0.01   | 0.07  | 0.31  |
| <i>Alloprevotella</i>             | 0.18  | 0.56 | 0.75 | -0.04 | 0.06 | 0.56   | -0.06 | 0.49  |
| <i>Dorea</i>                      | -0.32 | 0.19 | 0.10 | -0.02 | 0.02 | 0.39   | -0.06 | 0.36  |
| <i>Ruminococcus 2</i>             | 0.45  | 0.23 | 0.06 | 0.02  | 0.03 | 0.51   | 0.15  | 0.049 |
| <i>Butyricicoccus</i>             | 0.17  | 0.07 | 0.02 | 0.02  | 0.01 | 0.052  | 0.21  | 0.003 |
| Lachnospiraceae UCG-008           | -0.11 | 0.11 | 0.32 | -0.01 | 0.01 | 0.60   | 0.01  | 0.93  |
| <i>Ruminococcus 1</i>             | 0.36  | 0.21 | 0.08 | 0.03  | 0.02 | 0.18   | 0.10  | 0.20  |
| <i>Acidaminococcus</i>            | 0.37  | 0.20 | 0.07 | -0.01 | 0.02 | 0.82   | 0.08  | 0.29  |
| Ruminococcaceae family uncultured | 0.03  | 0.13 | 0.81 | 0.02  | 0.01 | 0.15   | 0.01  | 0.85  |
| <i>Parasutterella</i>             | 0.18  | 0.20 | 0.38 | 0.06  | 0.02 | 0.01   | 0.08  | 0.27  |
| <i>Streptococcus</i>              | -0.11 | 0.17 | 0.53 | 0.00  | 0.02 | 0.79   | 0.07  | 0.32  |
| <i>Mitsuokella</i>                | -0.21 | 0.45 | 0.65 | 0.00  | 0.05 | 0.93   | 0.02  | 0.84  |
| Prevotellaceae NK3B31 group       | -0.34 | 0.41 | 0.41 | -0.03 | 0.04 | 0.53   | 0.00  | 0.99  |
| <i>Dialister</i>                  | 0.17  | 0.13 | 0.19 | 0.00  | 0.01 | 0.92   | 0.08  | 0.27  |
| <i>Ruminiclostridium 5</i>        | -0.04 | 0.11 | 0.72 | 0.00  | 0.01 | 0.95   | 0.01  | 0.89  |
| Ruminococcaceae UCG-013           | 0.06  | 0.08 | 0.49 | 0.01  | 0.01 | 0.27   | 0.17  | 0.02  |
| <i>Barnesiella</i>                | 0.09  | 0.12 | 0.46 | 0.01  | 0.01 | 0.63   | 0.08  | 0.29  |

|                                            |       |      |      |       |      |      |       |      |
|--------------------------------------------|-------|------|------|-------|------|------|-------|------|
| Ruminococcaceae UCG-002                    | 0.14  | 0.13 | 0.25 | 0.00  | 0.01 | 0.98 | 0.07  | 0.38 |
| Rhodospirillaceae family uncultured        | 0.02  | 0.21 | 0.92 | 0.01  | 0.02 | 0.64 | -0.09 | 0.25 |
| <i>Ruminococcus</i> gauvreauii group       | 0.01  | 0.11 | 0.93 | -0.01 | 0.01 | 0.38 | -0.01 | 0.93 |
| <i>Paraprevotella</i>                      | -0.15 | 0.13 | 0.23 | 0.00  | 0.01 | 0.86 | -0.13 | 0.11 |
| <i>Odoribacter</i>                         | 0.01  | 0.08 | 0.87 | 0.00  | 0.01 | 0.88 | 0.02  | 0.76 |
| <i>Eubacterium</i> coprostanoligenes group | 0.13  | 0.10 | 0.21 | 0.02  | 0.01 | 0.03 | 0.07  | 0.38 |
| <i>Bilophila</i>                           | 0.05  | 0.05 | 0.29 | 0.00  | 0.01 | 0.46 | 0.06  | 0.40 |
| <i>Tyzzarella</i> 3                        | 0.19  | 0.13 | 0.16 | 0.06  | 0.01 | 0.00 | 0.16  | 0.04 |

<sup>1)</sup> Results of multiple regression analysis. Genus levels of microbiome relative abundance (%) were used as the dependent variable, barley consumption rate (0="Low barley group", 1="High barley group"), age (years), and sex (0="female", 1="male") were used as the independent variable. Estimate: Linear regression coefficient, SE: standard error.

<sup>2)</sup> Results of multiple regression analysis. Genus levels of microbiome relative abundance (%) were used as the dependent variable, barley consumption rate (g/1000 kcal), age (years), and sex (0="female", 1="male") were used as the independent variable. Estimate: Linear regression coefficient, SE: standard error.

<sup>3)</sup> Results of correlation test between barley consumption rate (g/1000 kcal) and genus levels of intestinal bacteria relative abundance (%) using Kendall method. Estimate: Kendall's correlation coefficient.

**Table S6** Association between the relative abundance of intestinal bacteria and barley intake group (0: low, 1: high)<sup>1</sup> by multivariate linear regression analyses ( $N = 236$ ).

|                                       | Model 1 |      |                | Model 2 |      |                | Model 3 |      |                |
|---------------------------------------|---------|------|----------------|---------|------|----------------|---------|------|----------------|
|                                       | R       | SE   | <i>P</i> value | R       | SE   | <i>P</i> value | R       | SE   | <i>P</i> value |
| <i>Bifidobacterium</i>                |         |      |                |         |      |                |         |      |                |
| Barley (0: low, 1: high) <sup>1</sup> | 2.52    | 1.00 | 0.012 *        | 2.61    | 1.03 | 0.012 *        | 2.59    | 1.03 | 0.013 *        |
| Sex (0: female, 1: male)              | -1.31   | 1.20 | 0.28           | -0.79   | 1.24 | 0.52           | -1.22   | 1.33 | 0.36           |
| Age (10 years)                        | 0.36    | 0.49 | 0.46           | 0.25    | 0.51 | 0.63           | 0.35    | 0.51 | 0.49           |
| Risk of diabetes (0–2)                | 0.45    | 1.32 | 0.73           | 0.79    | 1.34 | 0.55           | 0.96    | 1.34 | 0.48           |
| Risk of dyslipidemia (0–2)            | -0.17   | 0.60 | 0.77           | -0.14   | 0.60 | 0.81           | -0.09   | 0.60 | 0.87           |
| Risk of hypertension (0–2)            | -1.31   | 0.71 | 0.07 #         | -1.03   | 0.73 | 0.16           | -0.98   | 0.73 | 0.18           |
| Cereal (g/1000 kcal)                  |         |      |                | -0.01   | 0.01 | 0.44           | -0.02   | 0.01 | 0.101          |
| Sugar and sweetener (g/1000 kcal)     |         |      |                | 0.26    | 0.13 | 0.04 *         | 0.27    | 0.13 | 0.03 *         |
| Legume (g/1000 kcal)                  |         |      |                | 0.00    | 0.03 | 0.95           | 0.01    | 0.03 | 0.62           |
| Beverage (g/1000 kcal)                |         |      |                | 0.00    | 0.00 | 0.06 #         | -0.01   | 0.00 | 0.009 **       |
| Green vegetable (g/1000 kcal)         |         |      |                |         |      |                | -0.03   | 0.02 | 0.23           |
| Other vegetable (g/1000 kcal)         |         |      |                |         |      |                | -0.01   | 0.02 | 0.68           |
| Fish (g/1000 kcal)                    |         |      |                |         |      |                | -0.06   | 0.03 | 0.04 *         |
| Confectionery (g/1000 kcal)           |         |      |                |         |      |                | -0.02   | 0.04 | 0.60           |
| <i>Butyricoccus</i>                   |         |      |                |         |      |                |         |      |                |
| Barley (0: low, 1: high) <sup>1</sup> | 0.11    | 0.05 | 0.03 *         | 0.08    | 0.05 | 0.102          | 0.08    | 0.05 | 0.13           |
| Sex (0: female, 1: male)              | 0.02    | 0.06 | 0.73           | 0.03    | 0.06 | 0.64           | 0.07    | 0.07 | 0.32           |
| Age (10 years)                        | 0.01    | 0.02 | 0.75           | 0.01    | 0.03 | 0.60           | 0.01    | 0.03 | 0.73           |
| Risk of diabetes (0–2)                | 0.02    | 0.07 | 0.70           | 0.03    | 0.07 | 0.64           | 0.04    | 0.07 | 0.54           |
| Risk of dyslipidemia (0–2)            | -0.02   | 0.03 | 0.44           | -0.02   | 0.03 | 0.41           | -0.03   | 0.03 | 0.39           |
| Risk of hypertension (0–2)            | -0.01   | 0.04 | 0.81           | -0.01   | 0.04 | 0.72           | 0.00    | 0.04 | 0.95           |
| Cereal (g/1000 kcal)                  |         |      |                | 0.00    | 0.00 | 0.43           | 0.00    | 0.00 | 0.11           |
| Sugar and sweetener (g/1000 kcal)     |         |      |                | 0.00    | 0.01 | 0.78           | 0.00    | 0.01 | 0.76           |

|                               |      |      |      |      |      |      |  |  |  |
|-------------------------------|------|------|------|------|------|------|--|--|--|
| Legume (g/1000 kcal)          | 0.00 | 0.00 | 0.16 | 0.00 | 0.00 | 0.17 |  |  |  |
| Beverage (g/1000 kcal)        | 0.00 | 0.00 | 0.34 | 0.00 | 0.00 | 0.92 |  |  |  |
| Green vegetable (g/1000 kcal) |      |      |      | 0.00 | 0.00 | 0.22 |  |  |  |
| Other vegetable (g/1000 kcal) |      |      |      | 0.00 | 0.00 | 0.44 |  |  |  |
| Fish (g/1000 kcal)            |      |      |      | 0.00 | 0.00 | 0.99 |  |  |  |
| Confectionery (g/1000 kcal)   |      |      |      | 0.00 | 0.00 | 0.15 |  |  |  |

*Collinsella*

|                                       |       |      |      |       |      |      |       |      |        |
|---------------------------------------|-------|------|------|-------|------|------|-------|------|--------|
| Barley (0: low, 1: high) <sup>1</sup> | 0.27  | 0.30 | 0.37 | 0.26  | 0.31 | 0.41 | 0.15  | 0.31 | 0.63   |
| Sex (0: female, 1: male)              | 0.44  | 0.36 | 0.23 | 0.49  | 0.38 | 0.20 | 0.41  | 0.41 | 0.31   |
| Age (10 years)                        | -0.09 | 0.15 | 0.52 | -0.11 | 0.15 | 0.49 | -0.09 | 0.16 | 0.56   |
| Risk of diabetes (0–2)                | -0.26 | 0.40 | 0.51 | -0.24 | 0.41 | 0.56 | -0.17 | 0.41 | 0.68   |
| Risk of dyslipidemia (0–2)            | 0.03  | 0.18 | 0.86 | 0.04  | 0.18 | 0.84 | 0.04  | 0.18 | 0.83   |
| Risk of hypertension (0–2)            | -0.06 | 0.21 | 0.77 | -0.05 | 0.22 | 0.81 | 0.04  | 0.22 | 0.87   |
| Cereal (g/1000 kcal)                  |       |      |      | 0.00  | 0.00 | 0.70 | 0.00  | 0.00 | 0.75   |
| Sugar and sweetener (g/1000 kcal)     |       |      |      | 0.00  | 0.04 | 0.93 | 0.00  | 0.04 | 0.97   |
| Legume (g/1000 kcal)                  |       |      |      | 0.00  | 0.01 | 0.86 | 0.00  | 0.01 | 0.79   |
| Beverage (g/1000 kcal)                |       |      |      | 0.00  | 0.00 | 0.69 | 0.00  | 0.00 | 0.61   |
| Green vegetable (g/1000 kcal)         |       |      |      |       |      |      | 0.00  | 0.01 | 0.82   |
| Other vegetable (g/1000 kcal)         |       |      |      |       |      |      | 0.01  | 0.01 | 0.08 # |
| Fish (g/1000 kcal)                    |       |      |      |       |      |      | -0.02 | 0.01 | 0.02 * |
| Confectionery (g/1000 kcal)           |       |      |      |       |      |      | 0.00  | 0.01 | 0.85   |

*Ruminococcus 2*

|                                       |       |      |      |       |      |      |       |      |      |
|---------------------------------------|-------|------|------|-------|------|------|-------|------|------|
| Barley (0: low, 1: high) <sup>1</sup> | 0.10  | 0.15 | 0.53 | 0.11  | 0.16 | 0.48 | 0.09  | 0.16 | 0.58 |
| Sex (0: female, 1: male)              | -0.26 | 0.19 | 0.16 | -0.18 | 0.19 | 0.35 | -0.12 | 0.21 | 0.58 |
| Age (10 years)                        | 0.09  | 0.07 | 0.26 | 0.08  | 0.08 | 0.29 | 0.07  | 0.08 | 0.35 |
| Risk of diabetes (0–2)                | 0.11  | 0.20 | 0.60 | 0.09  | 0.21 | 0.65 | 0.14  | 0.21 | 0.50 |
| Risk of dyslipidemia (0–2)            | 0.00  | 0.09 | 1.00 | 0.02  | 0.09 | 0.81 | 0.03  | 0.09 | 0.73 |
| Risk of hypertension (0–2)            | -0.11 | 0.11 | 0.34 | -0.11 | 0.11 | 0.32 | -0.09 | 0.11 | 0.45 |

|                                   |       |      |      |       |      |      |
|-----------------------------------|-------|------|------|-------|------|------|
| Cereal (g/1000 kcal)              | 0.00  | 0.00 | 0.29 | 0.00  | 0.00 | 0.42 |
| Sugar and sweetener (g/1000 kcal) | -0.01 | 0.02 | 0.55 | -0.01 | 0.02 | 0.53 |
| Legume (g/1000 kcal)              | -0.01 | 0.00 | 0.20 | 0.00  | 0.00 | 0.41 |
| Beverage (g/1000 kcal)            | 0.00  | 0.00 | 0.20 | 0.00  | 0.00 | 0.23 |
| Green vegetable (g/1000 kcal)     |       |      |      | 0.00  | 0.00 | 0.34 |
| Other vegetable (g/1000 kcal)     |       |      |      | 0.00  | 0.00 | 0.37 |
| Fish (g/1000 kcal)                |       |      |      | 0.00  | 0.00 | 0.34 |
| Confectionery (g/1000 kcal)       |       |      |      | 0.01  | 0.01 | 0.33 |

*Dialister*

|                                       |       |      |        |       |      |        |       |      |         |
|---------------------------------------|-------|------|--------|-------|------|--------|-------|------|---------|
| Barley (0: low, 1: high) <sup>1</sup> | 0.10  | 0.09 | 0.24   | 0.08  | 0.09 | 0.41   | 0.06  | 0.09 | 0.50    |
| Sex (0: female, 1: male)              | 0.20  | 0.11 | 0.06 # | 0.14  | 0.11 | 0.19   | 0.20  | 0.12 | 0.098 # |
| Age (10 years)                        | -0.03 | 0.04 | 0.42   | -0.02 | 0.04 | 0.64   | -0.03 | 0.05 | 0.53    |
| Risk of diabetes (0–2)                | -0.08 | 0.12 | 0.48   | -0.10 | 0.12 | 0.41   | -0.07 | 0.12 | 0.54    |
| Risk of dyslipidemia (0–2)            | -0.06 | 0.05 | 0.27   | -0.07 | 0.05 | 0.19   | -0.07 | 0.05 | 0.22    |
| Risk of hypertension (0–2)            | -0.04 | 0.06 | 0.54   | -0.06 | 0.06 | 0.37   | -0.04 | 0.07 | 0.53    |
| Cereal (g/1000 kcal)                  |       |      |        | 0.00  | 0.00 | 0.12   | 0.00  | 0.00 | 0.06 #  |
| Sugar and sweetener (g/1000 kcal)     |       |      |        | -0.01 | 0.01 | 0.25   | -0.01 | 0.01 | 0.23    |
| Legume (g/1000 kcal)                  |       |      |        | 0.00  | 0.00 | 0.29   | 0.00  | 0.00 | 0.20    |
| Beverage (g/1000 kcal)                |       |      |        | 0.00  | 0.00 | 0.09 # | 0.00  | 0.00 | 0.055 # |
| Green vegetable (g/1000 kcal)         |       |      |        |       |      |        | 0.00  | 0.00 | 0.85    |
| Other vegetable (g/1000 kcal)         |       |      |        |       |      |        | 0.00  | 0.00 | 0.35    |
| Fish (g/1000 kcal)                    |       |      |        |       |      |        | 0.00  | 0.00 | 0.70    |
| Confectionery (g/1000 kcal)           |       |      |        |       |      |        | 0.00  | 0.00 | 0.19    |

<sup>1</sup>The range of barley intake is 0-3.5 g/1000 kcal in low, 3.5-28 g/1000 kcal in high.

Character means \*\*:  $P < 0.01$ , \*:  $P < 0.05$ , #:  $P < 0.1$

Model 1: Adjusted with sex, age, risk of diabetes, dyslipidemia, and hypertension.

Model 2: In addition to model 1, adjusted with an intake of cereal, sugar and sweetener, legume, and beverage.

Model 3: In addition to model 2, adjusted with green vegetable, other vegetable and confectionery

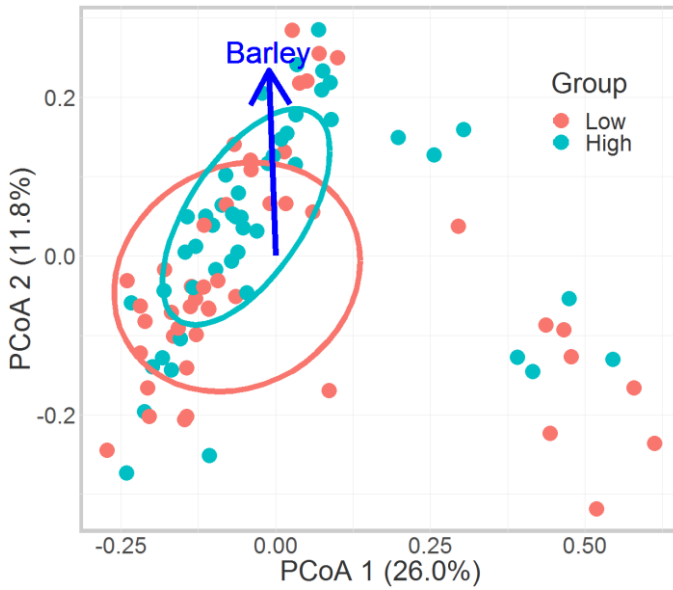

**Figure S1** PCoA result. Color means high or low consumption of barley ( $P = 0.08$ ). The arrow means high barley group ( $n = 94$ , aged 19-65 years, Japan, 2018).

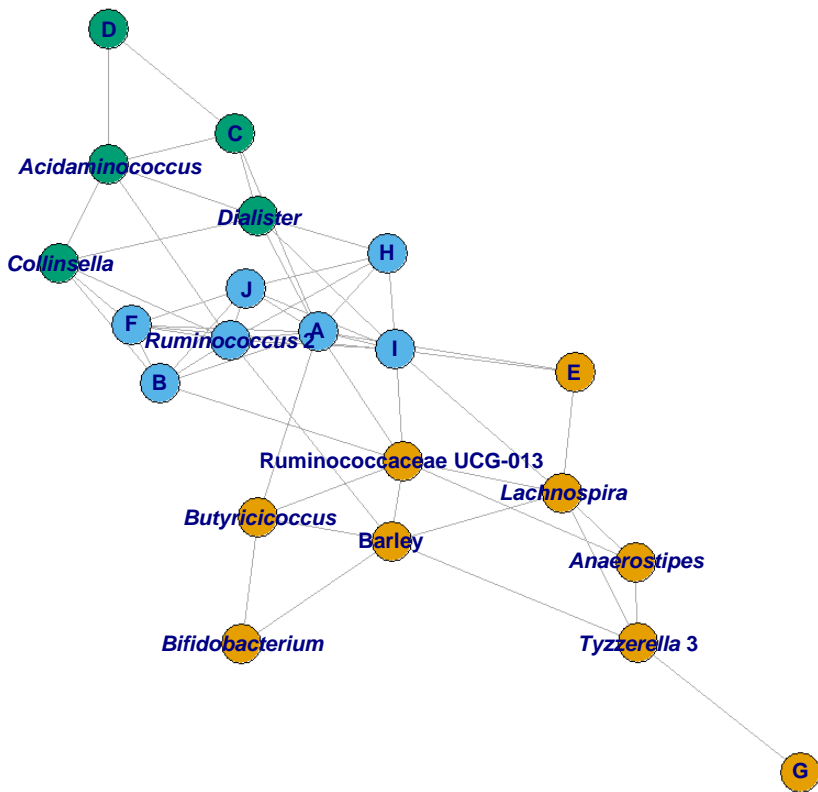

**Figure S2** The result of network analysis. Line means correlation  $|r| > 0.15$  (Kendall rank correlation test). Colors mean community groups. Described names are those in which the difference between low barley and high barley is  $P < 0.1$  (Mann-Whitney  $U$ -test) ( $n = 94$ , aged 19-65 years, Japan, 2018).

The bacteria described as characters are as follow; A: *Subdoligranulum*, B: *Eubacterium hallii* group, C: *Prevotella 2*, D: *Megasphaera*, E: *Roseburia*, F: *Veillonella*, G: *Lachnospiraceae* family uncultured, H: *Dorea*, I: *Ruminococcus 1*, J: *Eubacterium coprostanoligenes* group.
